# Supplementary material for: Modulation by Dietary Fat and Carbohydrate ofIRS1Association With Type 2 Diabetes Traits in Two Populations of Different Ancestries
Source: Oxford University Press journal article supplement (doi:10.2337/dc12-2607), 2013-04-18
Supplement: dc122607supplementarydata.pdf [file dc122607supplementarydata.pdf]

SUPPLEMENTARY DATA

**Supplementary Table 1.** Associations of *IRS1* variants with HOMA-IR and fasting insulin in the GOLDN and BPRHS populations<sup>1</sup>.

| Trait         | SNP       | Genotype | GOLDN             |                |                       | BPRHS             |                |                       | Meta-analysis <sup>2</sup> |          |
|---------------|-----------|----------|-------------------|----------------|-----------------------|-------------------|----------------|-----------------------|----------------------------|----------|
|               |           |          | Mean ± SEM (n)    | Beta (SEM)     | <i>P</i> <sup>1</sup> | Mean ± SEM (n)    | Beta (SEM)     | <i>P</i> <sup>1</sup> | Z-score                    | <i>P</i> |
| HOMA-IR       | rs7578326 | AG+GG    | 3.44 ± 0.11 (446) | -0.013 (0.005) | 0.010                 | 5.74 ± 0.33 (501) | -0.009 (0.005) | 0.069                 | -3.102                     | 0.002    |
|               |           | AA       | 3.82 ± 0.14 (374) |                |                       | 6.06 ± 0.41 (336) |                |                       |                            |          |
|               | rs2943641 | CT+TT    | 3.46 ± 0.10 (482) | -0.013 (0.005) | 0.020                 | 5.54 ± 0.33 (469) | -0.010 (0.005) | 0.043                 | -3.080                     | 0.002    |
|               |           | CC       | 3.84 ± 0.15 (338) |                |                       | 6.24 ± 0.39 (373) |                |                       |                            |          |
| Insulin, mU/L | rs7578326 | AG+GG    | 13.4 ± 0.3 (446)  | -0.010 (0.003) | 0.003                 | 17.6 ± 0.7 (501)  | -0.009 (0.004) | 0.028                 | -3.648                     | 0.0003   |
|               |           | AA       | 14.9 ± 0.5 (374)  |                |                       | 18.7 ± 0.9 (336)  |                |                       |                            |          |
|               | rs2943641 | CT+TT    | 13.5 ± 0.3 (482)  | -0.008 (0.004) | 0.019                 | 17.4 ± 0.8 (469)  | -0.007 (0.004) | 0.071                 | -2.932                     | 0.003    |
|               |           | CC       | 14.9 ± 0.5 (338)  |                |                       | 18.7 ± 0.9 (373)  |                |                       |                            |          |

<sup>1</sup> Values are means ± SEM; SNP, single-nucleotide polymorphism; HOMA-IR, homeostasis model assessment of insulin resistance. *P*-values in GOLDN were adjusted for age, sex, waist circumference, study center, smoking status, alcohol drinking, type 2 diabetes, physical activity and family relationships. *P*-values in the BPRHS were adjusted for age, sex, waist circumference, smoking status, alcohol drinking, type 2 diabetes, physical activity, and population structure.

<sup>2</sup> Meta-analysis was used to combine Z statistics across GOLDN and the BPRHS, weighted by the sample size.

SUPPLEMENTARY DATA

**Supplementary Table 2.** Associations between *IRS1* haplotypes and risk of type 2 diabetes, impaired fasting glucose/type 2 diabetes and metabolic syndrome in GOLDN and the BPRHS<sup>1</sup>.

| Haplotype <sup>2</sup><br>(carriers vs<br>non-carriers) | Frequency | Type 2 diabetes               |                       | IFG/T2D                       |                       | Metabolic syndrome            |                       |
|---------------------------------------------------------|-----------|-------------------------------|-----------------------|-------------------------------|-----------------------|-------------------------------|-----------------------|
|                                                         |           | Pooled odds ratio<br>(95% CI) | <i>P</i> <sup>3</sup> | Pooled odds<br>ratio (95% CI) | <i>P</i> <sup>3</sup> | Pooled odds ratio<br>(95% CI) | <i>P</i> <sup>3</sup> |
| A-T                                                     | 0.043     | 0.74 (95% CI:<br>0.47-1.18)   | 0.205                 | 0.53 (95% CI:<br>0.36-0.80)   | 0.002                 | 0.76 (95% CI:<br>0.52-1.10)   | 0.141                 |
| A-C                                                     | 0.629     | 1.62 (95% CI:<br>1.10-2.38)   | 0.014                 | 1.46 (95% CI:<br>1.06-2.01)   | 0.020                 | 1.46 (95% CI:<br>1.09-1.96)   | 0.012                 |
| G-T                                                     | 0.312     | 0.86 (95% CI:<br>0.66-1.13)   | 0.283                 | 1.04 (95% CI:<br>0.82-1.31)   | 0.743                 | 0.98 (95% CI:<br>0.79-1.21)   | 0.862                 |
| G-C                                                     | 0.016     | 1.23 (95% CI:<br>0.82-1.84)   | 0.312                 | 1.40 (95% CI:<br>0.93-2.11)   | 0.103                 | 0.99 (95% CI:<br>0.68-1.45)   | 0.954                 |

<sup>1</sup> Values are OR and 95% CI; IFG/T2D, impaired fasting glucose/type 2 diabetes.

<sup>2</sup> *IRS1* haplotypes were estimated based on 2 single-nucleotide polymorphisms in the following order: rs7578326 and rs2943641.

<sup>3</sup> Meta-analysis was used to combine the effect size estimates (beta coefficients) from GOLDN and the BPRHS, weighted by the inverse of the corresponding standard errors. *P*-values in GOLDN were adjusted for age, sex, study center, smoking status, alcohol drinking, physical activity and family relationships for metabolic syndrome, and were further adjusted for waist circumference for type 2 diabetes and IFG/T2D. *P*-values in the BPRHS were adjusted for age, sex, smoking status, alcohol drinking, physical activity, and population structure for metabolic syndrome, and were further adjusted for waist circumference for type 2 diabetes and IFG/T2D.

SUPPLEMENTARY DATA

**Supplementary Table 3.** Associations between *IRS1* haplotypes and HOMA-IR and fasting insulin in the GOLDN and BPRHS populations<sup>1</sup>.

|               | Haplotype    |                   | GOLDN             |                |                   | BPRHS             |                |       | Meta-analysis <sup>2</sup> |       |
|---------------|--------------|-------------------|-------------------|----------------|-------------------|-------------------|----------------|-------|----------------------------|-------|
|               |              |                   | Mean ± SEM (n)    | Beta (SEM)     | P                 | Mean ± SEM (n)    | Beta (SEM)     | P     | Z-score                    | P     |
| HOMA-IR       | A-T          | Non-carriers      | 3.61 ± 0.09 (752) | -0.005 (0.009) | 0.576             | 5.97 ± 0.27 (760) | 0.008 (0.008)  | 0.338 | 0.290                      | 0.772 |
|               |              | Carriers          | 3.72 ± 0.27 (68)  |                |                   | 4.76 ± 0.53 (84)  |                |       |                            |       |
|               | A-C          | Non-carriers      | 3.20 ± 0.18 (113) | -0.004 (0.007) | 0.514             | 4.54 ± 0.37 (143) | -0.012 (0.007) | 0.074 | -1.731                     | 0.084 |
|               |              | Carriers          | 3.68 ± 0.10 (707) |                |                   | 6.11 ± 0.29 (701) |                |       |                            |       |
| G-T           | Non-carriers | 3.80 ± 0.14 (386) | 0.013 (0.005)     | 0.012          | 5.97 ± 0.35 (426) | 0.007 (0.005)     | 0.139          | 2.817 | 0.005                      |       |
|               | Carriers     | 3.45 ± 0.11 (434) |                   |                | 5.72 ± 0.37 (418) |                   |                |       |                            |       |
| G-C           | Non-carriers | 3.63 ± 0.09 (795) | 0.005 (0.011)     | 0.679          | 5.97 ± 0.29 (712) | 0.011 (0.007)     | 0.121          | 1.395 | 0.163                      |       |
|               | Carriers     | 3.20 ± 0.35 (25)  |                   |                | 5.16 ± 0.47 (132) |                   |                |       |                            |       |
| Insulin, mU/L | A-T          | Non-carriers      | 14.0 ± 0.3 (752)  | -0.006 (0.006) | 0.329             | 18.1 ± 0.6 (760)  | 0.004 (0.007)  | 0.534 | -0.242                     | 0.809 |
|               |              | Carriers          | 14.5 ± 0.9 (68)   |                |                   | 16.6 ± 1.5 (84)   |                |       |                            |       |
|               | A-C          | Non-carriers      | 12.5 ± 0.6 (113)  | -0.006 (0.005) | 0.258             | 15.7 ± 1.1 (143)  | -0.012 (0.005) | 0.029 | -2.349                     | 0.019 |
|               |              | Carriers          | 14.3 ± 0.3 (707)  |                |                   | 18.4 ± 0.6 (701)  |                |       |                            |       |
|               | G-T          | Non-carriers      | 14.8 ± 0.5 (386)  | 0.009 (0.003)  | 0.005             | 18.2 ± 0.8 (426)  | 0.006 (0.004)  | 0.119 | 3.072                      | 0.002 |
|               |              | Carriers          | 13.4 ± 0.4 (434)  |                |                   | 17.7 ± 0.8 (418)  |                |       |                            |       |
|               | G-C          | Non-carriers      | 14.1 ± 0.3 (795)  | 0.008 (0.010)  | 0.431             | 18.3 ± 0.6 (712)  | 0.012 (0.006)  | 0.030 | 2.098                      | 0.036 |
|               |              | Carriers          | 12.9 ± 1.5 (25)   |                |                   | 16.0 ± 1.1 (132)  |                |       |                            |       |

<sup>1</sup> Values are means ± SEM; *IRS1* haplotypes were estimated based on 2 single-nucleotide polymorphisms in the following order: rs7578326 and rs2943641. *P*-values in GOLDN were adjusted for age, sex, waist circumference, study center, smoking status, alcohol drinking, type 2 diabetes, physical activity and family relationships. *P*-values in the BPRHS were adjusted for age, sex, waist circumference, smoking status, alcohol drinking, type 2 diabetes, physical activity, and population structure.

<sup>2</sup> Meta-analysis was used to combine *Z* statistics across GOLDN and the BPRHS, weighted by the sample size.

SUPPLEMENTARY DATA

**Supplementary Table 4.** Interaction of *IRSI* haplotype G-T with diet on HOMA-IR and risk of metabolic syndrome in the GOLDN population<sup>1</sup>.

| Diet                      | Total energy, % | HOMA-IR              |                      |                              |                                    | Metabolic syndrome                                 |                              |                                    |
|---------------------------|-----------------|----------------------|----------------------|------------------------------|------------------------------------|----------------------------------------------------|------------------------------|------------------------------------|
|                           |                 | G-T carriers (n)     | G-T non-carriers (n) | <i>P</i> -trend <sup>2</sup> | <i>P</i> -interaction <sup>2</sup> | Odds ratio (95% CI) (G-T carriers vs non-carriers) | <i>P</i> -trend <sup>3</sup> | <i>P</i> -interaction <sup>3</sup> |
| MUFA                      | ≤ 13.2          | 3.24 ± 0.13<br>(212) | 3.82 ± 0.21<br>(197) | 0.002                        | 0.051                              | 0.66 (95% CI: 0.42-1.01)                           | 0.058                        | 0.057                              |
|                           | > 13.2          | 3.66 ± 0.17<br>(220) | 3.77 ± 0.19<br>(189) | 0.759                        |                                    | 1.27 (95% CI: 0.77-2.08)                           | 0.347                        |                                    |
| SFA                       | ≤ 11.8          | 3.23 ± 0.14<br>(210) | 3.92 ± 0.19<br>(199) | 0.001                        | 0.031                              | 0.67 (95% CI: 0.44-1.02)                           | 0.063                        | 0.056                              |
|                           | > 11.8          | 3.66 ± 0.16<br>(222) | 3.67 ± 0.20<br>(187) | 0.856                        |                                    | 1.17 (95% CI: 0.75-1.82)                           | 0.486                        |                                    |
| Total fat                 | ≤ 35.7          | 3.16 ± 0.12<br>(209) | 3.78 ± 0.18<br>(200) | 0.003                        | 0.067                              | 0.61 (95% CI: 0.40-0.95)                           | 0.029                        | 0.032                              |
|                           | > 35.7          | 3.73 ± 0.18<br>(223) | 3.82 ± 0.22<br>(186) | 0.795                        |                                    | 1.26 (95% CI: 0.77-2.06)                           | 0.358                        |                                    |
| Carbohydrate              | ≤ 49.1          | 3.70 ± 0.17<br>(230) | 3.78 ± 0.23<br>(179) | 0.691                        | 0.007                              | 1.38 (95% CI: 0.84-2.25)                           | 0.204                        | 0.008                              |
|                           | > 49.1          | 3.18 ± 0.12<br>(202) | 3.82 ± 0.17<br>(207) | 0.0005                       |                                    | 0.57 (95% CI: 0.38-0.86)                           | 0.008                        |                                    |
| SFA-to-carbohydrate ratio | ≤ 0.24          | 3.10 ± 0.12<br>(201) | 3.86 ± 0.17<br>(208) | 0.0001                       | 0.005                              | 0.51 (95% CI: 0.34-0.79)                           | 0.002                        | 0.002                              |
|                           | > 0.24          | 3.77 ± 0.17<br>(231) | 3.73 ± 0.23<br>(178) | 0.572                        |                                    | 1.49 (95% CI: 0.89-2.49)                           | 0.126                        |                                    |

<sup>1</sup> Values are means ± SEM or OR and 95% CI; MUFA, monounsaturated fatty acid; SFA, saturated fatty acid. *IRSI* haplotypes were estimated based on 2 single-nucleotide polymorphisms in the following order: rs7578326 and rs2943641.

<sup>2</sup> *P*-values were adjusted for age, sex, waist circumference, study center, smoking status, alcohol drinking, type 2 diabetes, physical activity and family relationships.

<sup>3</sup> *P*-values were adjusted for age, sex, study center, smoking status, alcohol drinking, physical activity and family relationships.

SUPPLEMENTARY DATA

**Supplementary Table 5.** Interaction of *IRSI* haplotype A-C with dietary glyceemic load and glyceemic index on risk of metabolic syndrome in the GOLDN and BPRHS populations <sup>1</sup>.

|       | Diet                                | Odds ratio (95% CI) (A-C non-carriers vs carriers) | <i>P</i> -trend | <i>P</i> -interaction |
|-------|-------------------------------------|----------------------------------------------------|-----------------|-----------------------|
| GOLDN | Low glyceemic load ( $\leq 111.5$ ) | 0.38 (95% CI: 0.18-0.63)                           | 0.0002          | 0.006                 |
|       | High glyceemic load ( $> 111.5$ )   | 1.36 (95% CI: 0.10-2.84)                           | 0.419           |                       |
|       | Low glyceemic index ( $\leq 49.1$ ) | 0.58 (95% CI: 0.19-1.10)                           | 0.094           | 0.918                 |
|       | High glyceemic index ( $> 49.1$ )   | 0.63 (95% CI: 0.18-1.17)                           | 0.143           |                       |
| BPRHS | Low glyceemic load ( $\leq 141.2$ ) | 0.70 (95% CI: 0.39-1.26)                           | 0.235           | 0.77                  |
|       | High glyceemic load ( $> 141.2$ )   | 0.78 (95% CI: 0.46-1.33)                           | 0.364           |                       |
|       | Low glyceemic index ( $\leq 57.1$ ) | 0.50 (95% CI: 0.28-0.87)                           | 0.014           | 0.034                 |
|       | High glyceemic index ( $> 57.1$ )   | 1.15 (95% CI: 0.65-2.03)                           | 0.641           |                       |

<sup>1</sup> Values are odds ratio and 95% CI; *IRSI* haplotypes were estimated based on 2 single-nucleotide polymorphisms in the following order: rs7578326 and rs2943641. *P*-values in GOLDN were adjusted for age, sex, study center, smoking status, alcohol drinking, physical activity and family relationships. *P*-values in the BPRHS were adjusted for age, sex, smoking status, alcohol drinking, physical activity, and population structure.
